# Supplementary material
Source: Springer Nature journal article supplement (https://www.springermedizin.de/resource/supplementary/12936_2008_762_MOESM2_ESM.pdf/9548450)

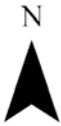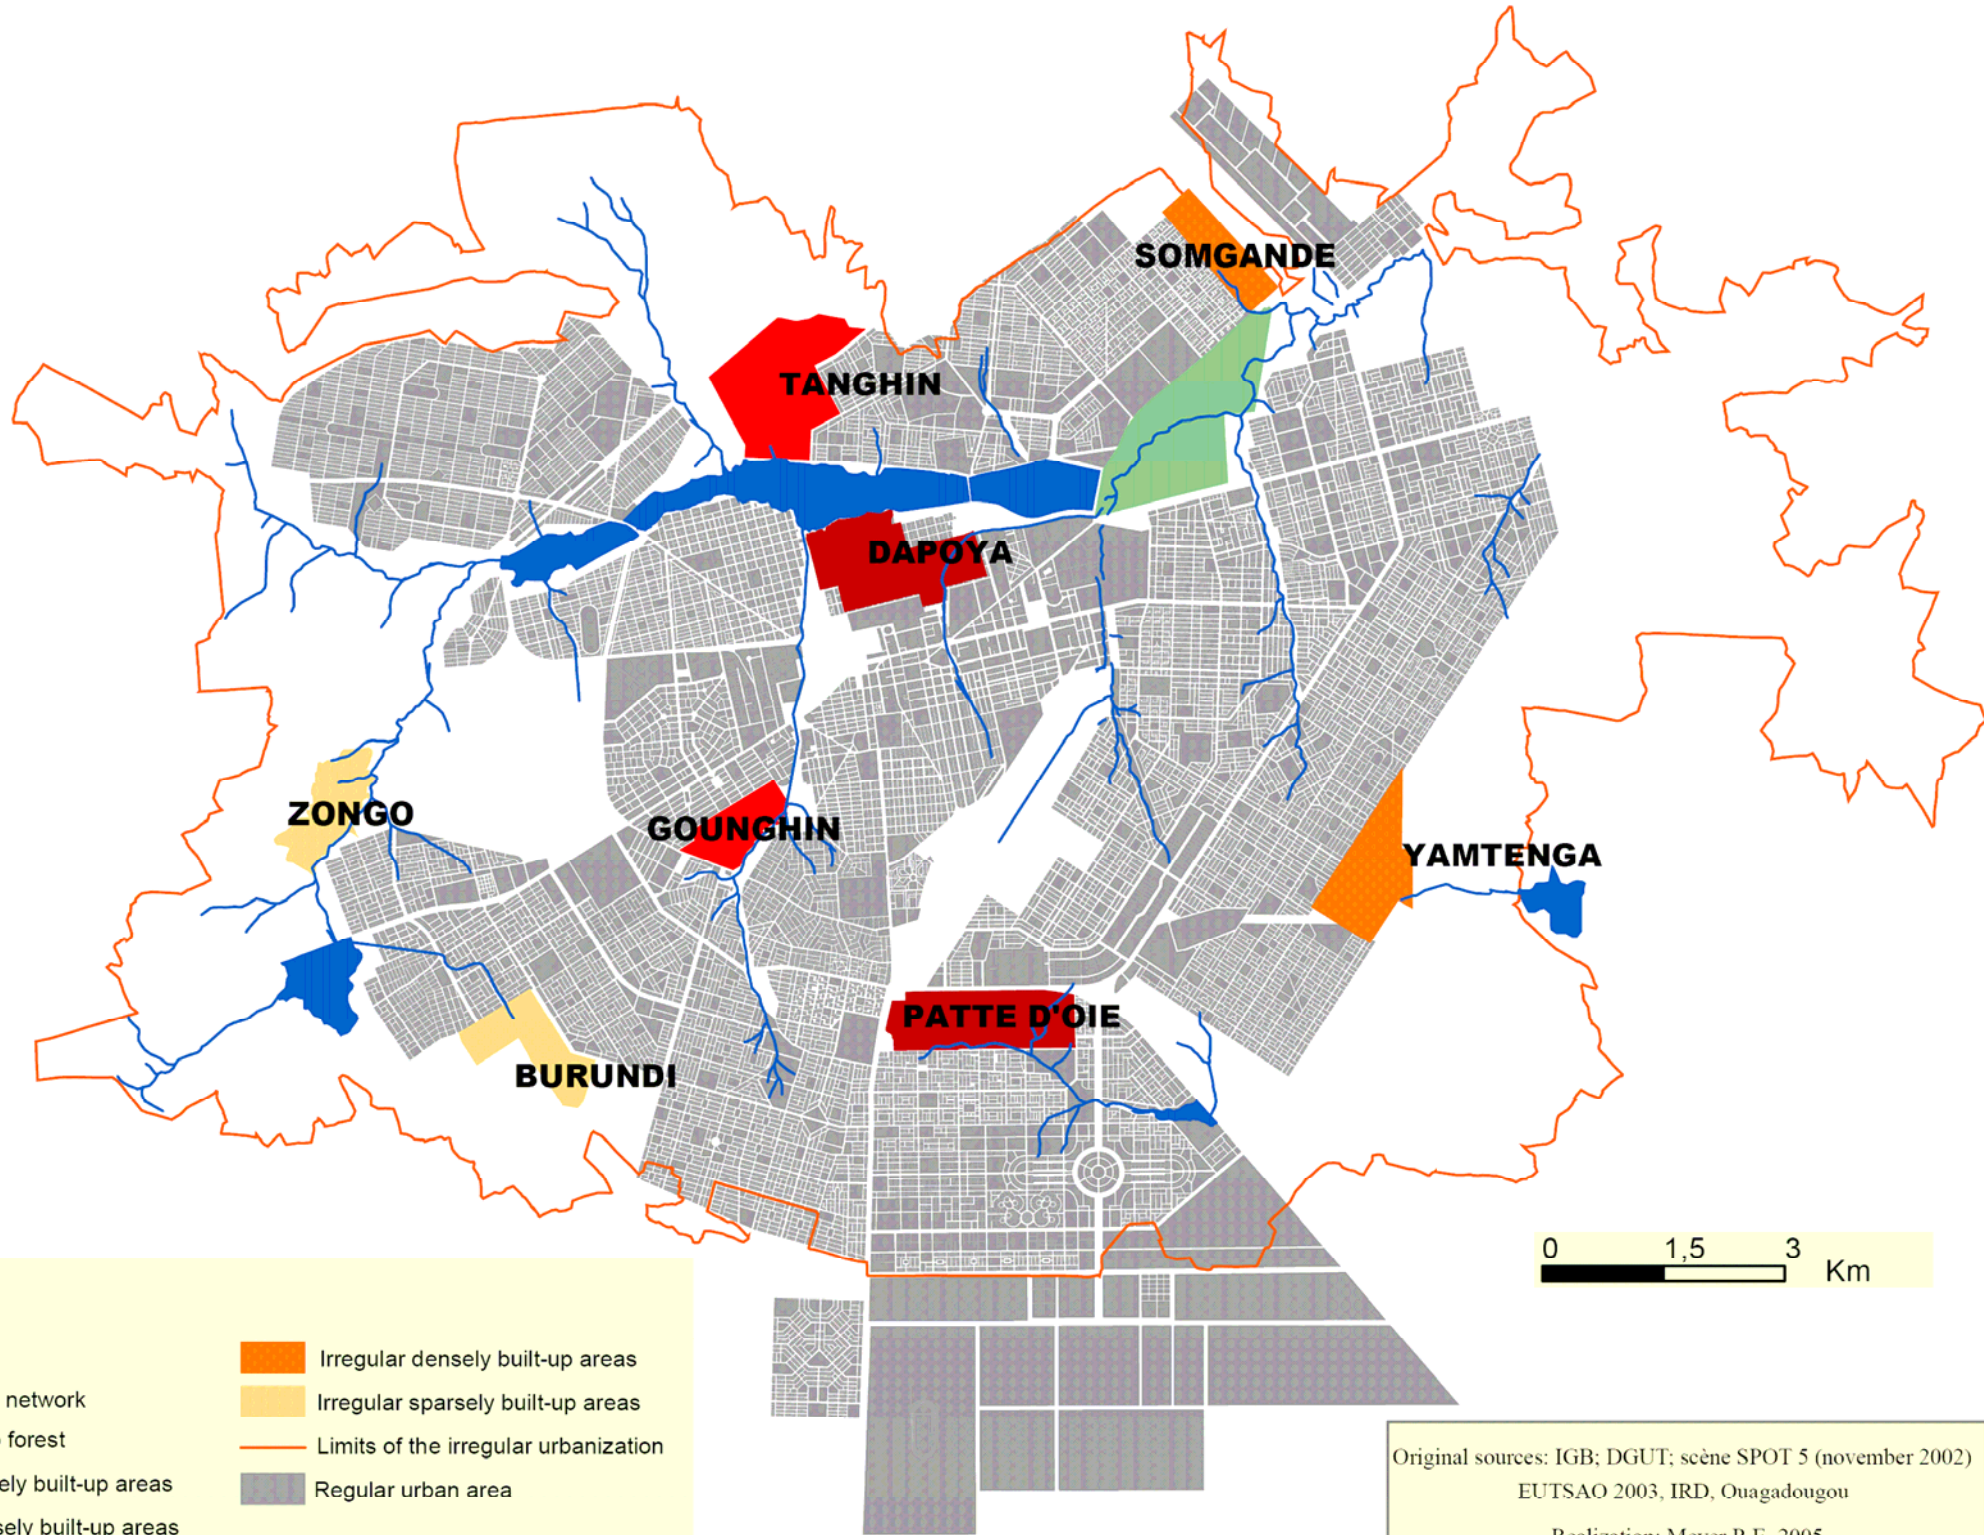

Original sources: IGB; DGUT; scène SPOT 5 (november 2002)  
EUTSAO 2003, IRD, Ouagadougou  
Realization: Meyer P-E, 2005

Supplement: MOESM2 [file 9548450]
